# Supplementary material for: Aptamer-functionalized DNA microgels: a strategy towards selective anticancer therapeutic systems
Source: Royal Society of Chemistry journal article supplement (doi:10.1039/c6tb01224h), 2016-01-01
Supplement: c6tb01224h1.pdf [file c6tb01224h1.pdf]

**Electronic Supplementary Material (ESI) for *J. Mater. Chem. B***  
**This journal is © The Royal Society of Chemistry 2015**

## Aptamer-functionalized DNA microgels: a strategy towards selective anticancer therapeutic system

Yitong Wang,<sup>a</sup> Miaomiao Yan,<sup>b</sup> Lu Xu,<sup>a</sup> Wenrong Zhao,<sup>a</sup> Xiaolin Wang,<sup>a</sup> Shuli  
Dong<sup>a</sup> and Jingcheng Hao<sup>\*a</sup>

<sup>a</sup> *Key Laboratory of Colloid and Interface Chemistry & Key Laboratory of Special Aggregated Materials, Shandong University, Ministry of Education, Jinan 250100, P. R. China.*

<sup>b</sup> *Department of Pharmacy, Binzhou Medical College, Yantai 264003, P. R. China*

\* Corresponding author. Tel: +86-531-88366074. E-mail: [jhao@sdu.edu.cn](mailto:jhao@sdu.edu.cn)

## Supplementary Figures

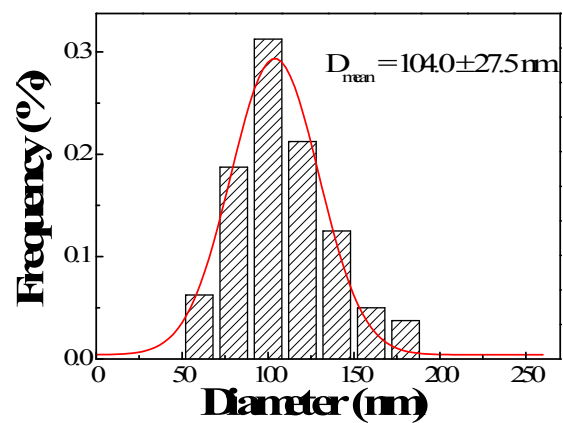

Fig. S1. Size-dependent (in diameter) distribution of the DNA microgels.

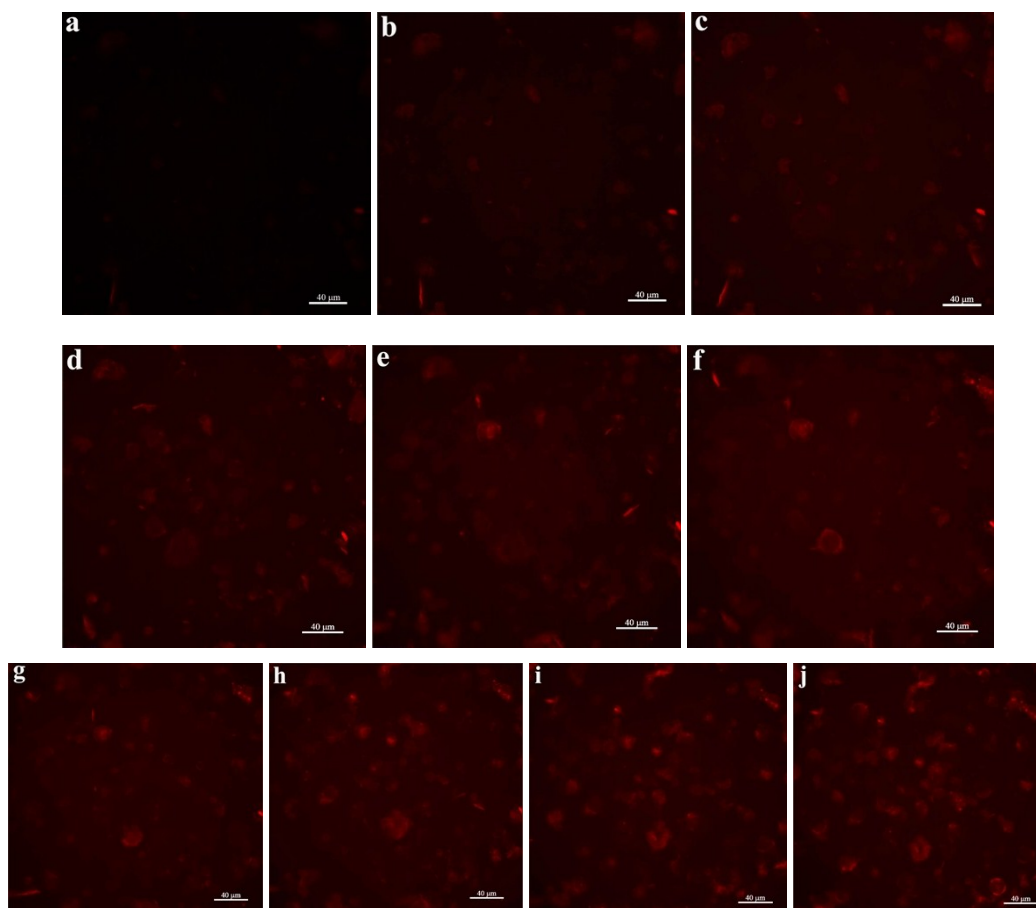

Fig. S2. Fluorescence microscopy images of A549 cells incubated with AptMG-Dox for different time: (a) 0 min, (b) 10 min, (c) 30 min, (d) 1h, (e) 3h, (f) 5h, (g) 10h, (h) 15h, (i) 20 h, (j) 24h.
